# Supplementary material
Source: Springer Nature journal article supplement (https://www.springermedizin.de/resource/supplementary/12967_2011_777_MOESM7_ESM.pdf/9577016)
Supplement: MOESM7 [file 9577016]

Figure 4

**(A) Establish lab SOP for MHC peptide multimer staining:**

A1 Count at least 100,000 CD8 T cells per staining.

A2 Establish adequate measures to quantify non-specific binding of MULTIMER to CD8-positive cells (e.g. irrelevant MULTIMER or autofluorescence).

A3 Establish adequate measures to reduce the amount of non-specific binding of MULTIMERS in the CD8-positive population to allow accurate quantification (e.g. DUMP channel or DEAD cell dyes).

**(B) Establish SOP for software analyses of stained samples, including:**

*B1 Gating strategy.*

*B2 Rules to set the gates.*

**(C) Establish a human auditing process of all final results:**

*C1 Are all dot plots correctly compensated?*

*C2 Have the gates been set correctly?*

*C3 Are the reported frequencies of multimer-positive cells plausible?*

**(D) Lab environment**

D1 Only let experienced personnel (per lab SOP) conduct assay.

**(E) Implement a structured framework to report data from MULTIMER experiments that makes sure that essential pieces of information are not missed (e.g. MIATA or other MI projects).**

*E1 Showing at least one representative data set that provides information on the gating style applied and the amount of MULTIMER binding to CD8-negative cells.*
